# Supplementary material
Source: Springer Nature journal article supplement (https://www.springermedizin.de/resource/supplementary/13601_2012_301_MOESM1_ESM.pdf/9677924)

Soya ELISA. Standard curve in human serum (50%)

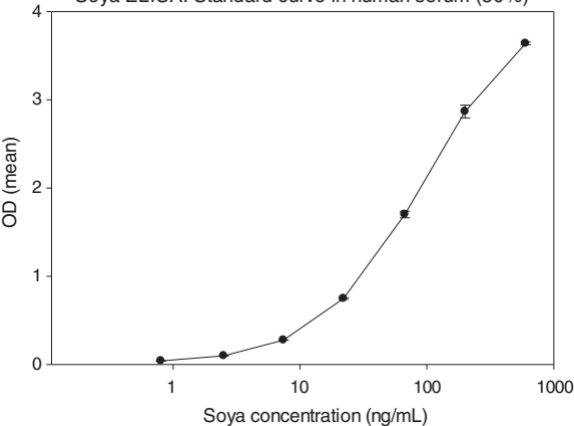

Supplement: MOESM1 [file 9677924]
